# Supplementary material for: The Removal of Airborne Severe Acute Respiratory Syndrome Coronavirus 2 (SARS-CoV-2) and Other Microbial Bioaerosols by Air Filtration on Coronavirus Disease 2019 (COVID-19) Surge Units
Source: Clin Infect Dis. 2021 Oct 30;75(1):e97–e101. doi: 10.1093/cid/ciab933 (PMC8689842; doi:10.1093/cid/ciab933)
Supplement: ciab933_suppl_Supplementary_Data_S1 [file ciab933_suppl_supplementary_data_s1.xlsx]

## Sheet: Fluidigm_Air_RAW ACM
Sample.Name	Day_number	Filter_location	week	Filter_status	unit	Aerosol_Fraction	Ct.Value	Pathogen	Classification	interpretation
Con-0002D1	1	NA	1	NA	Control	Medium	Negative	Negative	Negative	Negative
Con-0003D1	1	NA	1	NA	Control	Small	Negative	Negative	Negative	Negative
Con-0002D2	2	NA	1	NA	Control	Large	Negative	Negative	Negative	Negative
Con-0001D2	2	NA	1	NA	Control	Medium	Negative	Negative	Negative	Negative
Con-0003D2	2	NA	1	NA	Control	Small	21.0604	Candida spp.	Fungi	Positive
Con-0003D2	2	NA	1	NA	Control	Small	21.2467	CoN Staph	Bacteria	Positive
Con-0003D2	2	NA	1	NA	Control	Small	19.8792	Fungal 18S	Fungi	Positive
Con-0002D3	3	NA	1	NA	Control	Large	Negative	Negative	Negative	Negative
Con-0001D3	3	NA	1	NA	Control	Medium	Negative	Negative	Negative	Negative
Con-0001D3	3	NA	1	NA	Control	Small	Negative	Negative	Negative	Negative
Con-0002D4	4	NA	1	NA	Control	Large	Negative	Negative	Negative	Negative
Con-0003D4	4	NA	1	NA	Control	Medium	19.3071	E. faecalis	Bacteria	Bacteria
Con-0001D4	4	NA	1	NA	Control	Small	22.3151	Fungal 18S	Fungi	Positive
Con-0002D5	5	NA	1	NA	Control	Large	Negative	Negative	Negative	Negative
Con-0003D5	5	NA	1	NA	Control	Medium	Negative	Negative	Negative	Negative
Con-0001D5	5	NA	1	NA	Control	Small	Negative	Negative	Negative	Negative
Con-0002D6	6	NA	2	NA	Control	Large	Negative	Negative	Negative	Negative
Con-0001D6	6	NA	2	NA	Control	Medium	Negative	Negative	Negative	Negative
Con-0003D6	6	NA	2	NA	Control	Small	Negative	Negative	Negative	Negative
Con-0001D7	7	NA	2	NA	Control	Large	Negative	Negative	Negative	Negative
Con-0002D7	7	NA	2	NA	Control	Medium	Negative	Negative	Negative	Negative
Con-0003D7	7	NA	2	NA	Control	Small	20.9518	CoN Staph	Bacteria	Positive
Con-0002D8	8	NA	2	NA	Control	Large	Negative	Negative	Negative	Negative
Con-0001D8	8	NA	2	NA	Control	Medium	Negative	Negative	Negative	Negative
Con-0003D8	8	NA	2	NA	Control	Small	Negative	Negative	Negative	Negative
Con-0003D9	9	NA	2	NA	Control	Large	Negative	Negative	Negative	Negative
Con-0002D9	9	NA	2	NA	Control	Medium	Negative	Negative	Negative	Negative
Con-0001D9	9	NA	2	NA	Control	Small	Negative	Negative	Negative	Negative
Con-0002D10	10	NA	2	NA	Control	Large	Negative	Negative	Negative	Negative
Con-0001D10	10	NA	2	NA	Control	Medium	Negative	Negative	Negative	Negative
Con-0003D10	10	NA	2	NA	Control	Small	Negative	Negative	Negative	Negative
Con-0001D11	11	NA	3	OFF	Control	Large	Negative	Negative	Negative	failed
Con-0002D11	11	NA	3	OFF	Control	Medium	Negative	Negative	Negative	failed
Con-0003D11	11	NA	3	OFF	Control	Small	Negative	Negative	Negative	failed
Con-0002D12	12	NA	3	OFF	Control	Large	Negative	Negative	Negative	failed
Con-0001D12	12	NA	3	OFF	Control	Medium	Negative	Negative	Negative	failed
Con-0003D12	12	NA	3	OFF	Control	Small	Negative	Negative	Negative	failed
Con-0001D13	13	NA	3	OFF	Control	Large	Negative	Negative	Negative	failed
Con-0002D13	13	NA	3	OFF	Control	Medium	Negative	Negative	Negative	failed
Con-0003D13	13	NA	3	OFF	Control	Small	Negative	Negative	Negative	failed
Con-0002D14	14	NA	3	OFF	Control	Large	Negative	Negative	Negative	failed
Con-0003D14	14	NA	3	OFF	Control	Medium	Negative	Negative	Negative	failed
Con-0001D14	14	NA	3	OFF	Control	Small	Negative	Negative	Negative	failed
Con-000NAD15	15	NA	3	OFF	Control	Large	Negative	Negative	Negative	failed
Con-000NAD15	15	NA	3	OFF	Control	Medium	Negative	Negative	Negative	failed
Con-000NAD15	15	NA	3	OFF	Control	Small	Negative	Negative	Negative	failed
ICU-0007D1	1	Away_1	1	OFF	ICU	Large	Negative	Negative	Negative	Negative
ICU-0004D1	1	Away_1.7	1	OFF	ICU	Large	19.8578	CoN Staph	Bacteria	Positive
ICU-0001D1	1	Near	1	OFF	ICU	Large	Negative	Negative	Negative	Negative
ICU-0008D1	1	Away_1	1	OFF	ICU	Medium	Negative	Negative	Negative	Negative
ICU-0005D1	1	Away_1.7	1	OFF	ICU	Medium	Negative	Negative	Negative	Negative
ICU-0002D1	1	Near	1	OFF	ICU	Medium	21.9649	P. mirabilis	Bacteria	Positive
ICU-0002D1	1	Near	1	OFF	ICU	Medium	18.4607	Fungal 18S	Fungi	Positive
ICU-0002D1	1	Near	1	OFF	ICU	Medium	21.7357	CoN Staph	Bacteria	Positive
ICU-0009D1	1	Away_1	1	OFF	ICU	Small	Negative	Negative	Negative	Negative
ICU-0006D1	1	Away_1.7	1	OFF	ICU	Small	Negative	Negative	Negative	Negative
ICU-0003D1	1	Near	1	OFF	ICU	Small	Negative	Negative	Negative	Negative
ICU-0001D2	2	Away_1	1	OFF	ICU	Large	Negative	Negative	Negative	Negative
ICU-0004D2	2	Away_1.7	1	OFF	ICU	Large	19.0911	Fungal 18S	Fungi	Positive
ICU-0007D2	2	Near	1	OFF	ICU	Large	Negative	Negative	Negative	Negative
ICU-0002D2	2	Away_1	1	OFF	ICU	Medium	Negative	Negative	Negative	Negative
ICU-0005D2	2	Away_1.7	1	OFF	ICU	Medium	Negative	Negative	Negative	Negative
ICU-0008D2	2	Near	1	OFF	ICU	Medium	Negative	Negative	Negative	Negative
ICU-0003D2	2	Away_1	1	OFF	ICU	Small	20.2182	E. faecalis	Bacteria	Positive
ICU-0003D2	2	Away_1	1	OFF	ICU	Small	21.7705	Fungal 18S	Fungi	Positive
ICU-0003D2	2	Away_1	1	OFF	ICU	Small	22.2924	Staphylococcus aureus	Bacteria	Positive
ICU-0006D2	2	Away_1.7	1	OFF	ICU	Small	Negative	Negative	Negative	Negative
ICU-0009D2	2	Near	1	OFF	ICU	Small	17.6866	E. faecium	Bacteria	Positive
ICU-0004D3	3	Away_1	1	OFF	ICU	Large	22.3703	CoN Staph	Bacteria	Positive
ICU-0001D3	3	Away_1.7	1	OFF	ICU	Large	Negative	Negative	Negative	Negative
ICU-0007D3	3	Near	1	OFF	ICU	Large	22.6227	P. mirabilis	Bacteria	Positive
ICU-0007D3	3	Near	1	OFF	ICU	Large	20.825	Candida spp.	Fungi	Positive
ICU-0007D3	3	Near	1	OFF	ICU	Large	19.8361	CoN Staph	Bacteria	Positive
ICU-0005D3	3	Away_1	1	OFF	ICU	Medium	20.2141	CoN Staph	Bacteria	Positive
ICU-0005D3	3	Away_1	1	OFF	ICU	Medium	20.8635	Fungal 18S	Fungi	Positive
ICU-0002D3	3	Away_1.7	1	OFF	ICU	Medium	20.8474	P. mirabilis	Bacteria	Positive
ICU-0002D3	3	Away_1.7	1	OFF	ICU	Medium	16.4555	Fungal 18S	Fungi	Positive
ICU-0002D3	3	Away_1.7	1	OFF	ICU	Medium	20.6155	HSV	Virus	Positive
ICU-0002D3	3	Away_1.7	1	OFF	ICU	Medium	22.7789	S. epidermidis	Bacteria	Positive
ICU-0002D3	3	Away_1.7	1	OFF	ICU	Medium	18.6915	SARS-CoV-2	Virus	Positive
ICU-0002D3	3	Away_1.7	1	OFF	ICU	Medium	17.1203	CoN Staph	Bacteria	Positive
ICU-0008D3	3	Near	1	OFF	ICU	Medium	19.4553	E. faecalis	Bacteria	Positive
ICU-0008D3	3	Near	1	OFF	ICU	Medium	21.8569	HSV	Virus	Positive
ICU-0008D3	3	Near	1	OFF	ICU	Medium	20.8139	E. faecium	Bacteria	Positive
ICU-0008D3	3	Near	1	OFF	ICU	Medium	18.7475	CoN Staph	Bacteria	Positive
ICU-0008D3	3	Near	1	OFF	ICU	Medium	21.5479	Fungal 18S	Fungi	Positive
ICU-0006D3	3	Away_1	1	OFF	ICU	Small	Negative	Negative	Negative	Negative
ICU-0003D3	3	Away_1.7	1	OFF	ICU	Small	Negative	Negative	Negative	Negative
ICU-0009D3	3	Near	1	OFF	ICU	Small	20.3226	E. faecalis	Bacteria	Positive
ICU-0007D4	4	Away_1	1	OFF	ICU	Large	21.5398	CoN Staph	Bacteria	Positive
ICU-0007D4	4	Away_1	1	OFF	ICU	Large	Negative	Negative	Negative	Negative
ICU-0004D4	4	Away_1.7	1	OFF	ICU	Large	21.9563	Fungal 18S	Fungi	Positive
ICU-0001D4	4	Near	1	OFF	ICU	Large	22.399	Candida spp.	Fungi	Positive
ICU-0001D4	4	Near	1	OFF	ICU	Large	20.5647	CoN Staph	Bacteria	Positive
ICU-0001D4	4	Near	1	OFF	ICU	Large	16.9536	Fungal 18S	Fungi	Positive
ICU-0008D4	4	Away_1	1	OFF	ICU	Medium	Negative	Negative	Negative	Negative
ICU-0005D4	4	Away_1.7	1	OFF	ICU	Medium	22.3534	Candida spp.	Fungi	Positive
ICU-0005D4	4	Away_1.7	1	OFF	ICU	Medium	20.7829	CoN Staph	Bacteria	Positive
ICU-0005D4	4	Away_1.7	1	OFF	ICU	Medium	19.4118	Fungal 18S	Fungi	Positive
ICU-0002D4	4	Near	1	OFF	ICU	Medium	Negative	Negative	Negative	Negative
ICU-0009D4	4	Away_1	1	OFF	ICU	Small	Negative	Negative	Negative	Negative
ICU-0006D4	4	Away_1.7	1	OFF	ICU	Small	Negative	Negative	Negative	Negative
ICU-0003D4	4	Near	1	OFF	ICU	Small	20.1589	CoN Staph	Bacteria	Positive
ICU-0003D4	4	Near	1	OFF	ICU	Small	21.6436	HSV	Virus	Positive
ICU-0004D5	5	Away_1	1	OFF	ICU	Large	Negative	Negative	Negative	Negative
ICU-0001D5	5	Away_1.7	1	OFF	ICU	Large	20.6611	Candida spp.	Fungi	Positive
ICU-0007D5	5	Near	1	OFF	ICU	Large	21.7099	CoN Staph	Bacteria	Positive
ICU-0007D5	5	Near	1	OFF	ICU	Large	20.4167	Fungal 18S	Fungi	Positive
ICU-0007D5	5	Near	1	OFF	ICU	Large	21.1621	E. faecium	Bacteria	Positive
ICU-0005D5	5	Away_1	1	OFF	ICU	Medium	Negative	Negative	Negative	Positive
ICU-0002D5	5	Away_1.7	1	OFF	ICU	Medium	20.2688	Candida spp.	Fungi	Positive
ICU-0008D5	5	Near	1	OFF	ICU	Medium	Negative	Negative	Negative	Negative
ICU-0006D5	5	Away_1	1	OFF	ICU	Small	Negative	Negative	Negative	Negative
ICU-0003D5	5	Away_1.7	1	OFF	ICU	Small	Negative	Negative	Negative	Negative
ICU-0009D5	5	Near	1	OFF	ICU	Small	Negative	Negative	Negative	Negative
ICU-0004D6	6	Away_1	2	ON	ICU	Large	Negative	Negative	Negative	Negative
ICU-0007D6	6	Away_1.7	2	ON	ICU	Large	Negative	Negative	Negative	Negative
ICU-0001D6	6	Near	2	ON	ICU	Large	Negative	Negative	Negative	Negative
ICU-0005D6	6	Away_1	2	ON	ICU	Medium	Negative	Negative	Negative	Negative
ICU-0008D6	6	Away_1.7	2	ON	ICU	Medium	Negative	Negative	Negative	Negative
ICU-0002D6	6	Near	2	ON	ICU	Medium	Negative	Negative	Negative	Negative
ICU-0006D6	6	Away_1	2	ON	ICU	Small	Negative	Negative	Negative	Negative
ICU-0009D6	6	Away_1.7	2	ON	ICU	Small	Negative	Negative	Negative	Negative
ICU-0003D6	6	Near	2	ON	ICU	Small	Negative	Negative	Negative	Negative
ICU-0007D7	7	Away_1	2	ON	ICU	Large	Negative	Negative	Negative	Negative
ICU-0004D7	7	Away_1.7	2	ON	ICU	Large	Negative	Negative	Negative	Negative
ICU-0001D7	7	Near	2	ON	ICU	Large	Negative	Negative	Negative	Negative
ICU-0008D7	7	Away_1	2	ON	ICU	Medium	Negative	Negative	Negative	Negative
ICU-0005D7	7	Away_1.7	2	ON	ICU	Medium	Negative	Negative	Negative	Negative
ICU-0002D7	7	Near	2	ON	ICU	Medium	Negative	Negative	Negative	Negative
ICU-0009D7	7	Away_1	2	ON	ICU	Small	22.4041	S. pyogenes	Bacteria	Positive
ICU-0006D7	7	Away_1.7	2	ON	ICU	Small	Negative	Negative	Negative	Negative
ICU-0003D7	7	Near	2	ON	ICU	Small	Negative	Negative	Negative	Negative
ICU-0005D8	8	Away_1	2	ON	ICU	Large	Negative	Negative	Negative	Negative
ICU-0002D8	8	Away_1.7	2	ON	ICU	Large	Negative	Negative	Negative	Negative
ICU-0008D8	8	Near	2	ON	ICU	Large	Negative	Negative	Negative	Negative
ICU-0004D8	8	Away_1	2	ON	ICU	Medium	Negative	Negative	Negative	Negative
ICU-0001D8	8	Away_1.7	2	ON	ICU	Medium	Negative	Negative	Negative	Negative
ICU-0007D8	8	Near	2	ON	ICU	Medium	Negative	Negative	Negative	Negative
ICU-0006D8	8	Away_1	2	ON	ICU	Small	Negative	Negative	Negative	Negative
ICU-0003D8	8	Away_1.7	2	ON	ICU	Small	Negative	Negative	Negative	Negative
ICU-0009D8	8	Near	2	ON	ICU	Small	Negative	Negative	Negative	Negative
ICU-0005D9	9	Away_1	2	ON	ICU	Large	Negative	Negative	Negative	Negative
ICU-0002D9	9	Away_1.7	2	ON	ICU	Large	Negative	Negative	Negative	Negative
ICU-0008D9	9	Near	2	ON	ICU	Large	Negative	Negative	Negative	Negative
ICU-0004D9	9	Away_1	2	ON	ICU	Medium	Negative	Negative	Negative	Negative
ICU-0001D9	9	Away_1.7	2	ON	ICU	Medium	Negative	Negative	Negative	Negative
ICU-0007D9	9	Near	2	ON	ICU	Medium	Negative	Negative	Negative	Negative
ICU-0006D9	9	Away_1	2	ON	ICU	Small	Negative	Negative	Negative	Negative
ICU-0003D9	9	Away_1.7	2	ON	ICU	Small	Negative	Negative	Negative	Negative
ICU-0009D9	9	Near	2	ON	ICU	Small	Negative	Negative	Negative	Negative
ICU-0004D10	10	Away_1	2	ON	ICU	Large	Negative	Negative	Negative	Negative
ICU-0007D10	10	Away_1.7	2	ON	ICU	Large	Negative	Negative	Negative	Negative
ICU-0001D10	10	Near	2	ON	ICU	Large	Negative	Negative	Negative	Negative
ICU-0005D10	10	Away_1	2	ON	ICU	Medium	20.0677	CoN Staph	Bacteria	Positive
ICU-0005D10	10	Away_1	2	ON	ICU	Medium	22.1337	Fungal 18S	Fungi	Positive
ICU-0008D10	10	Away_1.7	2	ON	ICU	Medium	Negative	Negative	Negative	Negative
ICU-0002D10	10	Near	2	ON	ICU	Medium	22.9851	Fungal 18S	Fungi	Positive
ICU-0006D10	10	Away_1	2	ON	ICU	Small	Negative	Negative	Negative	Negative
ICU-0009D10	10	Away_1.7	2	ON	ICU	Small	Negative	Negative	Negative	Negative
ICU-0003D10	10	Near	2	ON	ICU	Small	Negative	Negative	Negative	Negative
ICU-0005D11	11	Away_1	3	OFF	ICU	Large	Negative	Negative	Negative	failed
ICU-0008D11	11	Away_1.7	3	OFF	ICU	Large	Negative	Negative	Negative	failed
ICU-0002D11	11	Near	3	OFF	ICU	Large	Negative	Negative	Negative	failed
ICU-0004D11	11	Away_1	3	OFF	ICU	Medium	Negative	Negative	Negative	failed
ICU-0007D11	11	Away_1.7	3	OFF	ICU	Medium	Negative	Negative	Negative	failed
ICU-0001D11	11	Near	3	OFF	ICU	Medium	Negative	Negative	Negative	failed
ICU-0006D11	11	Away_1	3	OFF	ICU	Small	Negative	Negative	Negative	failed
ICU-0009D11	11	Away_1.7	3	OFF	ICU	Small	Negative	Negative	Negative	failed
ICU-0003D11	11	Near	3	OFF	ICU	Small	Negative	Negative	Negative	failed
ICU-0007D12	12	Away_1	3	OFF	ICU	Large	Negative	Negative	Negative	failed
ICU-0004D12	12	Away_1.7	3	OFF	ICU	Large	Negative	Negative	Negative	failed
ICU-0001D12	12	Near	3	OFF	ICU	Large	Negative	Negative	Negative	failed
ICU-0008D12	12	Away_1	3	OFF	ICU	Medium	Negative	Negative	Negative	failed
ICU-0005D12	12	Away_1.7	3	OFF	ICU	Medium	Negative	Negative	Negative	failed
ICU-0002D12	12	Near	3	OFF	ICU	Medium	Negative	Negative	Negative	failed
ICU-0009D12	12	Away_1	3	OFF	ICU	Small	Negative	Negative	Negative	failed
ICU-0006D12	12	Away_1.7	3	OFF	ICU	Small	Negative	Negative	Negative	failed
ICU-0003D12	12	Near	3	OFF	ICU	Small	Negative	Negative	Negative	failed
ICU-0004D13	13	Away_1	3	OFF	ICU	Large	Negative	Negative	Negative	failed
ICU-0007D13	13	Away_1.7	3	OFF	ICU	Large	Negative	Negative	Negative	failed
ICU-0001D13	13	Near	3	OFF	ICU	Large	Negative	Negative	Negative	failed
ICU-0005D13	13	Away_1	3	OFF	ICU	Medium	Negative	Negative	Negative	failed
ICU-0008D13	13	Away_1.7	3	OFF	ICU	Medium	Negative	Negative	Negative	failed
ICU-0002D13	13	Near	3	OFF	ICU	Medium	Negative	Negative	Negative	failed
ICU-0006D13	13	Away_1	3	OFF	ICU	Small	Negative	Negative	Negative	failed
ICU-0009D13	13	Away_1.7	3	OFF	ICU	Small	Negative	Negative	Negative	failed
ICU-0003D13	13	Near	3	OFF	ICU	Small	Negative	Negative	Negative	failed
ICU-0004D14	14	Away_1	3	OFF	ICU	Large	Negative	Negative	Negative	failed
ICU-0007D14	14	Away_1.7	3	OFF	ICU	Large	Negative	Negative	Negative	failed
ICU-0001D14	14	Near	3	OFF	ICU	Large	Negative	Negative	Negative	failed
ICU-0005D14	14	Away_1	3	OFF	ICU	Medium	Negative	Negative	Negative	failed
ICU-0008D14	14	Away_1.7	3	OFF	ICU	Medium	Negative	Negative	Negative	failed
ICU-0002D14	14	Near	3	OFF	ICU	Medium	Negative	Negative	Negative	failed
ICU-0006D14	14	Away_1	3	OFF	ICU	Small	Negative	Negative	Negative	failed
ICU-0009D14	14	Away_1.7	3	OFF	ICU	Small	Negative	Negative	Negative	failed
ICU-0003D14	14	Near	3	OFF	ICU	Small	Negative	Negative	Negative	failed
ICU-0007D15	15	Away_1	3	OFF	ICU	Large	Negative	Negative	Negative	failed
ICU-0004D15	15	Away_1.7	3	OFF	ICU	Large	Negative	Negative	Negative	failed
ICU-0001D15	15	Near	3	OFF	ICU	Large	Negative	Negative	Negative	failed
ICU-0008D15	15	Away_1	3	OFF	ICU	Medium	Negative	Negative	Negative	failed
ICU-0005D15	15	Away_1.7	3	OFF	ICU	Medium	Negative	Negative	Negative	failed
ICU-0002D15	15	Near	3	OFF	ICU	Medium	Negative	Negative	Negative	failed
ICU-0009D15	15	Away_1	3	OFF	ICU	Small	Negative	Negative	Negative	failed
ICU-0006D15	15	Away_1.7	3	OFF	ICU	Small	Negative	Negative	Negative	failed
ICU-0003D15	15	Near	3	OFF	ICU	Small	Negative	Negative	Negative	failed
Ward-0006D1	1	Away	1	OFF	Ward	Large	Negative	Negative	Negative	Negative
Ward-0001D1	1	Near	1	OFF	Ward	Large	Negative	Negative	Negative	Negative
Ward-0005D1	1	Away	1	OFF	Ward	Medium	Negative	Negative	Negative	Negative
Ward-0002D1	1	Near	1	OFF	Ward	Medium	17.1441	Fungal 18S	Fungi	Positive
Ward-0002D1	1	Near	1	OFF	Ward	Medium	21.3167	S. epidermidis	Bacteria	Positive
Ward-0002D1	1	Near	1	OFF	Ward	Medium	19.9097	CoN Staph	Bacteria	Positive
Ward-0004D1	1	Away	1	OFF	Ward	Small	Negative	Negative	Negative	Negative
Ward-0003D1	1	Near	1	OFF	Ward	Small	Negative	Negative	Negative	Negative
Ward-0005D2	2	Away	1	OFF	Ward	Large	19.9649	Fungal 18S	Fungi	Positive
Ward-0005D2	2	Away	1	OFF	Ward	Large	22.7596	P. mirabilis	Bacteria	Positive
Ward-0005D2	2	Away	1	OFF	Ward	Large	19.3505	Candida spp.	Fungi	Positive
Ward-0005D2	2	Away	1	OFF	Ward	Large	19.5407	CoN Staph	Bacteria	Positive
Ward-0001D2	2	Near	1	OFF	Ward	Large	Negative	Negative	Negative	Negative
Ward-0006D2	2	Away	1	OFF	Ward	Medium	17.5437	E. faecalis	Bacteria	Positive
Ward-0006D2	2	Away	1	OFF	Ward	Medium	22.5798	Fungal 18S	Fungi	Positive
Ward-0002D2	2	Near	1	OFF	Ward	Medium	20.5336	CoN Staph	Bacteria	Positive
Ward-0002D2	2	Near	1	OFF	Ward	Medium	20.546	P. mirabilis	Bacteria	Positive
Ward-0002D2	2	Near	1	OFF	Ward	Medium	13.2299	SARS-CoV-2	Virus	Positive
Ward-0002D2	2	Near	1	OFF	Ward	Medium	17.2285	E. faecalis	Bacteria	Positive
Ward-0002D2	2	Near	1	OFF	Ward	Medium	18.8705	Candida spp.	Fungi	Positive
Ward-0002D2	2	Near	1	OFF	Ward	Medium	17.951	Fungal 18S	Fungi	Positive
Ward-0004D2	2	Away	1	OFF	Ward	Small	Negative	Negative	Negative	Negative
Ward-0003D2	2	Near	1	OFF	Ward	Small	22.127	CoN Staph	Bacteria	Positive
Ward-0003D2	2	Near	1	OFF	Ward	Small	21.1539	Fungal 18S	Fungi	Positive
Ward-0006D3	3	Away	1	OFF	Ward	Large	20.679	CoN Staph	Bacteria	Positive
Ward-0006D3	3	Away	1	OFF	Ward	Large	22.5475	HPIV3	Virus	Positive
Ward-0006D3	3	Away	1	OFF	Ward	Large	21.3768	Candida spp.	Fungi	Positive
Ward-0002D3	3	Near	1	OFF	Ward	Large	19.0041	Fungal 18S	Fungi	Positive
Ward-0002D3	3	Near	1	OFF	Ward	Large	20.5767	CoN Staph	Bacteria	Positive
Ward-0002D3	3	Near	1	OFF	Ward	Large	16.7936	SARS-CoV-2	Virus	Positive
Ward-0005D3	3	Away	1	OFF	Ward	Medium	20.5616	Fungal 18S	Fungi	Positive
Ward-0005D3	3	Away	1	OFF	Ward	Medium	16.5738	SARS-CoV-2	Virus	Positive
Ward-0001D3	3	Near	1	OFF	Ward	Medium	21.8869	CoN Staph	Bacteria	Positive
Ward-0001D3	3	Near	1	OFF	Ward	Medium	21.8113	E. coli	Bacteria	Positive
Ward-0001D3	3	Near	1	OFF	Ward	Medium	18.3792	Candida spp.	Fungi	Positive
Ward-0001D3	3	Near	1	OFF	Ward	Medium	17.6794	Fungal 18S	Fungi	Positive
Ward-0001D3	3	Near	1	OFF	Ward	Medium	19.3763	CoN Staph	Bacteria	Positive
Ward-0001D3	3	Near	1	OFF	Ward	Medium	19.9885	Candida spp.	Fungi	Positive
Ward-0001D3	3	Near	1	OFF	Ward	Medium	22.9446	P. mirabilis	Bacteria	Positive
Ward-0004D3	3	Away	1	OFF	Ward	Small	19.8553	P. mirabilis	Bacteria	Positive
Ward-0004D3	3	Away	1	OFF	Ward	Small	18.9803	Candida spp.	Fungi	Positive
Ward-0004D3	3	Away	1	OFF	Ward	Small	19.7766	S. epidermidis	Bacteria	Positive
Ward-0003D3	3	Near	1	OFF	Ward	Small	Negative	Negative	Negative	Negative
Ward-0006D4	4	Away	1	OFF	Ward	Large	Negative	Negative	Negative	Negative
Ward-0003D4	4	Near	1	OFF	Ward	Large	20.8406	CoN Staph	Bacteria	Positive
Ward-0005D4	4	Away	1	OFF	Ward	Medium	21.8404	Fungal 18S	Fungi	Positive
Ward-0002D4	4	Near	1	OFF	Ward	Medium	14.9418	SARS-CoV-2	Virus	Positive
Ward-0002D4	4	Near	1	OFF	Ward	Medium	20.978	Fungal 18S	Fungi	Positive
Ward-0002D4	4	Near	1	OFF	Ward	Medium	20.0179	CoN Staph	Bacteria	Positive
Ward-0002D4	4	Near	1	OFF	Ward	Medium	22.0596	HSV	Virus	Positive
Ward-0004D4	4	Away	1	OFF	Ward	Small	Negative	Negative	Negative	Negative
Ward-0001D4	4	Near	1	OFF	Ward	Small	19.3583	SARS-CoV-2	Virus	Positive
Ward-0004D5	5	Away	1	OFF	Ward	Large	19.3808	SARS-CoV-2	Virus	Positive
Ward-0001D5	5	Near	1	OFF	Ward	Large	22.7832	CoN Staph	Bacteria	Positive
Ward-0005D5	5	Away	1	OFF	Ward	Medium	Negative	Negative	Negative	Negative
Ward-0002D5	5	Near	1	OFF	Ward	Medium	20.6696	CoN Staph	Bacteria	Positive
Ward-0002D5	5	Near	1	OFF	Ward	Medium	14.6425	SARS-CoV-2	Virus	Positive
Ward-0006D5	5	Away	1	OFF	Ward	Small	Negative	Negative	Negative	Negative
Ward-0003D5	5	Near	1	OFF	Ward	Small	19.6502	E. faecalis	Bacteria	Positive
Ward-0002D6	6	Away	2	ON	Ward	Large	Negative	Negative	Negative	Negative
Ward-0005D6	6	Near	2	ON	Ward	Large	Negative	Negative	Negative	Negative
Ward-0001D6	6	Away	2	ON	Ward	Medium	Negative	Negative	Negative	Negative
Ward-0004D6	6	Near	2	ON	Ward	Medium	Negative	Negative	Negative	Negative
Ward-0003D6	6	Away	2	ON	Ward	Small	Negative	Negative	Negative	Negative
Ward-0006D6	6	Near	2	ON	Ward	Small	Negative	Negative	Negative	Negative
Ward-0002D7	7	Away	2	ON	Ward	Large	Negative	Negative	Negative	Negative
Ward-0005D7	7	Near	2	ON	Ward	Large	Negative	Negative	Negative	Negative
Ward-0001D7	7	Away	2	ON	Ward	Medium	Negative	Negative	Negative	Negative
Ward-0004D7	7	Near	2	ON	Ward	Medium	Negative	Negative	Negative	Negative
Ward-0003D7	7	Away	2	ON	Ward	Small	Negative	Negative	Negative	Negative
Ward-0006D7	7	Near	2	ON	Ward	Small	Negative	Negative	Negative	Negative
Ward-0004D8	8	Away	2	ON	Ward	Large	Negative	Negative	Negative	Negative
Ward-0001D8	8	Near	2	ON	Ward	Large	Negative	Negative	Negative	Negative
Ward-0005D8	8	Away	2	ON	Ward	Medium	Negative	Negative	Negative	Negative
Ward-0002D8	8	Near	2	ON	Ward	Medium	Negative	Negative	Negative	Negative
Ward-0006D8	8	Away	2	ON	Ward	Small	Negative	Negative	Negative	Negative
Ward-0003D8	8	Near	2	ON	Ward	Small	Negative	Negative	Negative	Negative
Ward-0002D9	9	Away	2	ON	Ward	Large	Negative	Negative	Negative	Negative
Ward-0005D9	9	Near	2	ON	Ward	Large	Negative	Negative	Negative	Negative
Ward-0001D9	9	Away	2	ON	Ward	Medium	Negative	Negative	Negative	Negative
Ward-0004D9	9	Near	2	ON	Ward	Medium	Negative	Negative	Negative	Negative
Ward-0003D9	9	Away	2	ON	Ward	Small	Negative	Negative	Negative	Negative
Ward-0006D9	9	Near	2	ON	Ward	Small	Negative	Negative	Negative	Negative
Ward-0002D10	10	Away	2	ON	Ward	Large	Negative	Negative	Negative	Negative
Ward-0005D10	10	Near	2	ON	Ward	Large	20.9087	Candida spp.	Fungi	Positive
Ward-0001D10	10	Away	2	ON	Ward	Medium	21.647	Candida spp.	Fungi	Positive
Ward-0004D10	10	Near	2	ON	Ward	Medium	Negative	Negative	Negative	Negative
Ward-0003D10	10	Away	2	ON	Ward	Small	Negative	Negative	Negative	Negative
Ward-0006D10	10	Near	2	ON	Ward	Small	Negative	Negative	Negative	Negative
C6-0005D11	11	Away	3	OFF	Ward	Large	Negative	Negative	Negative	failed
C6-0002D11	11	Near	3	OFF	Ward	Large	Negative	Negative	Negative	failed
C6-0004D11	11	Away	3	OFF	Ward	Medium	Negative	Negative	Negative	failed
C6-0001D11	11	Near	3	OFF	Ward	Medium	Negative	Negative	Negative	failed
C6-0006D11	11	Away	3	OFF	Ward	Small	Negative	Negative	Negative	failed
C6-0003D11	11	Near	3	OFF	Ward	Small	Negative	Negative	Negative	failed
C6-0002D12	12	Away	3	OFF	Ward	Large	Negative	Negative	Negative	failed
C6-0005D12	12	Near	3	OFF	Ward	Large	Negative	Negative	Negative	failed
C6-0001D12	12	Away	3	OFF	Ward	Medium	Negative	Negative	Negative	failed
C6-0004D12	12	Near	3	OFF	Ward	Medium	Negative	Negative	Negative	failed
C6-0003D12	12	Away	3	OFF	Ward	Small	Negative	Negative	Negative	failed
C6-0006D12	12	Near	3	OFF	Ward	Small	Negative	Negative	Negative	failed
C6-0002D13	13	Away	3	OFF	Ward	Large	Negative	Negative	Negative	failed
C6-0005D13	13	Near	3	OFF	Ward	Large	Negative	Negative	Negative	failed
C6-0001D13	13	Away	3	OFF	Ward	Medium	Negative	Negative	Negative	failed
C6-0004D13	13	Near	3	OFF	Ward	Medium	Negative	Negative	Negative	failed
C6-0003D13	13	Away	3	OFF	Ward	Small	Negative	Negative	Negative	failed
C6-0006D13	13	Near	3	OFF	Ward	Small	Negative	Negative	Negative	failed
C6-0004D14	14	Away	3	OFF	Ward	Large	Negative	Negative	Negative	failed
C6-0001D14	14	Near	3	OFF	Ward	Large	Negative	Negative	Negative	failed
C6-0005D14	14	Away	3	OFF	Ward	Medium	Negative	Negative	Negative	failed
C6-0002D14	14	Near	3	OFF	Ward	Medium	Negative	Negative	Negative	failed
C6-0006D14	14	Away	3	OFF	Ward	Small	Negative	Negative	Negative	failed
C6-0003D14	14	Near	3	OFF	Ward	Small	Negative	Negative	Negative	failed
C6-000NAD15	15	Away	3	OFF	Ward	Large	Negative	Negative	Negative	failed
C6-000NAD15	15	Near	3	OFF	Ward	Large	Negative	Negative	Negative	failed
C6-000NAD15	15	Away	3	OFF	Ward	Medium	Negative	Negative	Negative	failed
C6-000NAD15	15	Near	3	OFF	Ward	Medium	Negative	Negative	Negative	failed
C6-000NAD15	15	Away	3	OFF	Ward	Small	Negative	Negative	Negative	failed
C6-000NAD15	15	Near	3	OFF	Ward	Small	Negative	Negative	Negative	failed
