# Supplementary material for: The Removal of Airborne Severe Acute Respiratory Syndrome Coronavirus 2 (SARS-CoV-2) and Other Microbial Bioaerosols by Air Filtration on Coronavirus Disease 2019 (COVID-19) Surge Units
Source: Clin Infect Dis. 2021 Oct 30;75(1):e97–e101. doi: 10.1093/cid/ciab933 (PMC8689842; doi:10.1093/cid/ciab933)
Supplement: ciab933_suppl_Supplementary_Data_S2 [file ciab933_suppl_supplementary_data_s2.xlsx]

## Sheet: SARS_AIR_qPCR_RAW1
Sample.Name	Day_number	Unit	Filter_Location	Aerosol_Fraction	Ct.Value	Week	Filter_status	interpretation
Ward-0001D1	1	Ward	Near	Large	Negative	1	off	negative
Ward-0002D1	1	Ward	Near	Medium	38.915	1	off	positive
Ward-0003D1	1	Ward	Near	Small	Negative	1	off	negative
Ward-0004D1	1	Ward	Away	Small	Negative	1	off	negative
Ward-0005D1	1	Ward	Away	Medium	Negative	1	off	negative
Ward-0006D1	1	Ward	Away	Large	Negative	1	off	negative
ICU-0001D1	1	ICU	Near	Large	Negative	1	off	negative
ICU-0002D1	1	ICU	Near	Medium	Negative	1	off	negative
ICU-0003D1	1	ICU	Near	Small	Negative	1	off	negative
ICU-0004D1	1	ICU	Away_1.7	Large	Negative	1	off	negative
ICU-0005D1	1	ICU	Away_1.7	Medium	Negative	1	off	negative
ICU-0006D1	1	ICU	Away_1.7	Small	Negative	1	off	negative
ICU-0007D1	1	ICU	Away_1	Large	Negative	1	off	negative
ICU-0008D1	1	ICU	Away_1	Medium	Negative	1	off	negative
ICU-0009D1	1	ICU	Away_1	Small	Negative	1	off	negative
Con-0001D1	1	control	NA	Large	Negative	1	NA	negative
Con-0002D1	1	control	NA	Medium	Negative	1	NA	negative
Con-0003D1	1	control	NA	Small	Negative	1	NA	negative
Ward-0001D2	2	Ward	Near	Large	Negative	1	off	negative
Ward-0002D2	2	Ward	Near	Medium	38.096	1	off	positive
Ward-0003D2	2	Ward	Near	Small	Negative	1	off	negative
Ward-0004D2	2	Ward	Away	Small	Negative	1	off	negative
Ward-0005D2	2	Ward	Away	Large	40.43	1	off	positive
Ward-0006D2	2	Ward	Away	Medium	Negative	1	off	negative
ICU-0001D2	2	ICU	Away_1	Large	Negative	1	off	negative
ICU-0002D2	2	ICU	Away_1	Medium	Negative	1	off	negative
ICU-0003D2	2	ICU	Away_1	Small	Negative	1	off	negative
ICU-0004D2	2	ICU	Away_1.7	Large	Negative	1	off	negative
ICU-0005D2	2	ICU	Away_1.7	Medium	Negative	1	off	negative
ICU-0006D2	2	ICU	Away_1.7	Small	Negative	1	off	negative
ICU-0007D2	2	ICU	Near	Large	Negative	1	off	negative
ICU-0008D2	2	ICU	Near	Medium	Negative	1	off	negative
ICU-0009D2	2	ICU	Near	Small	Negative	1	off	negative
Con-0001D2	2	control	NA	Medium	Negative	1	NA	negative
Con-0002D2	2	control	NA	Large	Negative	1	NA	negative
Con-0003D2	2	control	NA	Small	Negative	1	NA	negative
Ward-0001D3	3	Ward	Near	Medium	Negative	1	off	negative
Ward-0002D3	3	Ward	Near	Large	40.207	1	off	positive
Ward-0003D3	3	Ward	Near	Small	Negative	1	off	negative
Ward-0004D3	3	Ward	Away	Small	Negative	1	off	negative
Ward-0005D3	3	Ward	Away	Medium	Negative	1	off	negative
Ward-0006D3	3	Ward	Away	Large	Negative	1	off	negative
ICU-0001D3	3	ICU	Away_1.7	Large	Negative	1	off	negative
ICU-0002D3	3	ICU	Away_1.7	Medium	Negative	1	off	negative
ICU-0003D3	3	ICU	Away_1.7	Small	Negative	1	off	negative
ICU-0004D3	3	ICU	Away_1	Large	Negative	1	off	negative
ICU-0005D3	3	ICU	Away_1	Medium	Negative	1	off	negative
ICU-0006D3	3	ICU	Away_1	Small	Negative	1	off	negative
ICU-0007D3	3	ICU	Near	Large	Negative	1	off	negative
ICU-0008D3	3	ICU	Near	Medium	Negative	1	off	negative
ICU-0009D3	3	ICU	Near	Small	Negative	1	off	negative
Con-0001D3	3	control	NA	Small	Negative	1	NA	negative
Con-0002D3	3	control	NA	Large	Negative	1	NA	negative
Con-0003D3	3	control	NA	Little Tube	Negative	1	NA	negative
Ward-0001D4	4	Ward	Near	Small	Negative	1	off	negative
Ward-0002D4	4	Ward	Near	Medium	39.024	1	off	positive
Ward-0003D4	4	Ward	Near	Large	Negative	1	off	negative
Ward-0004D4	4	Ward	Away	Small	Negative	1	off	negative
Ward-0005D4	4	Ward	Away	Medium	Negative	1	off	negative
Ward-0006D4	4	Ward	Away	Large	Negative	1	off	negative
ICU-0001D4	4	ICU	Near	Large	Negative	1	off	negative
ICU-0002D4	4	ICU	Near	Medium	Negative	1	off	negative
ICU-0003D4	4	ICU	Near	Small	Negative	1	off	negative
ICU-0004D4	4	ICU	Away_1.7	Large	Negative	1	off	negative
ICU-0005D4	4	ICU	Away_1.7	Medium	Negative	1	off	negative
ICU-0006D4	4	ICU	Away_1.7	Small	Negative	1	off	negative
ICU-0007D4	4	ICU	Away_1	Large	Negative	1	off	negative
ICU-0008D4	4	ICU	Away_1	Medium	Negative	1	off	negative
ICU-0009D4	4	ICU	Away_1	Small	Negative	1	off	negative
Con-0001D4	4	control	NA	Small	Negative	1	NA	negative
Con-0002D4	4	control	NA	Large	Negative	1	NA	negative
Con-0003D4	4	control	NA	Medium	Negative	1	NA	negative
Ward-0001D5	5	Ward	Near	Large	Negative	1	off	negative
Ward-0002D5	5	Ward	Near	Medium	Negative	1	off	negative
Ward-0003D5	5	Ward	Near	Small	Negative	1	off	negative
Ward-0004D5	5	Ward	Away	Large	37.534	1	off	positive
Ward-0005D5	5	Ward	Away	Medium	Negative	1	off	negative
Ward-0006D5	5	Ward	Away	Small	Negative	1	off	negative
ICU-0001D5	5	ICU	Away_1.7	Large	Negative	1	off	negative
ICU-0002D5	5	ICU	Away_1.7	Medium	Negative	1	off	negative
ICU-0003D5	5	ICU	Away_1.7	Small	Negative	1	off	negative
ICU-0004D5	5	ICU	Away_1	Large	Negative	1	off	negative
ICU-0005D5	5	ICU	Away_1	Medium	Negative	1	off	negative
ICU-0006D5	5	ICU	Away_1	Small	Negative	1	off	negative
ICU-0007D5	5	ICU	Near	Large	Negative	1	off	negative
ICU-0008D5	5	ICU	Near	Medium	Negative	1	off	negative
ICU-0009D5	5	ICU	Near	Small	Negative	1	off	negative
Con-0001D5	5	control	NA	Small	Negative	1	NA	negative
Con-0002D5	5	control	NA	Large	Negative	1	NA	negative
Con-0003D5	5	control	NA	Medium	Negative	1	NA	negative
Ward-0001D6	6	Ward	Away	Medium	Negative	2	on	negative
Ward-0002D6	6	Ward	Away	Large	Negative	2	on	negative
Ward-0003D6	6	Ward	Away	Small	Negative	2	on	negative
Ward-0004D6	6	Ward	Near	Medium	Negative	2	on	negative
Ward-0005D6	6	Ward	Near	Large	Negative	2	on	negative
Ward-0006D6	6	Ward	Near	Small	Negative	2	on	negative
ICU-0001D6	6	ICU	Near	Large	Negative	2	on	negative
ICU-0002D6	6	ICU	Near	Medium	Negative	2	on	negative
ICU-0003D6	6	ICU	Near	Small	Negative	2	on	negative
ICU-0004D6	6	ICU	Away_1	Large	Negative	2	on	negative
ICU-0005D6	6	ICU	Away_1	Medium	Negative	2	on	negative
ICU-0006D6	6	ICU	Away_1	Small	Negative	2	on	negative
ICU-0007D6	6	ICU	Away_1.7	Large	Negative	2	on	negative
ICU-0008D6	6	ICU	Away_1.7	Medium	Negative	2	on	negative
ICU-0009D6	6	ICU	Away_1.7	Small	Negative	2	on	negative
Con-0001D6	6	control	NA	Medium	Negative	2	NA	negative
Con-0002D6	6	control	NA	Large	Negative	2	NA	negative
Con-0003D6	6	control	NA	Small	Negative	2	NA	negative
Ward-0001D7	7	Ward	Away	Medium	Negative	2	on	negative
Ward-0002D7	7	Ward	Away	Large	Negative	2	on	negative
Ward-0003D7	7	Ward	Away	Small	Negative	2	on	negative
Ward-0004D7	7	Ward	Near	Medium	Negative	2	on	negative
Ward-0005D7	7	Ward	Near	Large	Negative	2	on	negative
Ward-0006D7	7	Ward	Near	Small	Negative	2	on	negative
ICU-0001D7	7	ICU	Near	Large	Negative	2	on	negative
ICU-0002D7	7	ICU	Near	Medium	Negative	2	on	negative
ICU-0003D7	7	ICU	Near	Small	Negative	2	on	negative
ICU-0004D7	7	ICU	Away_1.7	Large	Negative	2	on	negative
ICU-0005D7	7	ICU	Away_1.7	Medium	Negative	2	on	negative
ICU-0006D7	7	ICU	Away_1.7	Small	Negative	2	on	negative
ICU-0007D7	7	ICU	Away_1	Large	Negative	2	on	negative
ICU-0008D7	7	ICU	Away_1	Medium	Negative	2	on	negative
ICU-0009D7	7	ICU	Away_1	Small	Negative	2	on	negative
Con-0001D7	7	control	NA	Large	Negative	2	NA	negative
Con-0002D7	7	control	NA	Medium	Negative	2	NA	negative
Con-0003D7	7	control	NA	Small	Negative	2	NA	negative
Ward-0001D8	8	Ward	Near	Large	Negative	2	on	negative
Ward-0002D8	8	Ward	Near	Medium	Negative	2	on	negative
Ward-0003D8	8	Ward	Near	Small	Negative	2	on	negative
Ward-0004D8	8	Ward	Away	Large	Negative	2	on	negative
Ward-0005D8	8	Ward	Away	Medium	Negative	2	on	negative
Ward-0006D8	8	Ward	Away	Small	Negative	2	on	negative
ICU-0001D8	8	ICU	Away_1.7	Medium	Negative	2	on	negative
ICU-0002D8	8	ICU	Away_1.7	Large	Negative	2	on	negative
ICU-0003D8	8	ICU	Away_1.7	Small	Negative	2	on	negative
ICU-0004D8	8	ICU	Away_1	Medium	Negative	2	on	negative
ICU-0005D8	8	ICU	Away_1	Large	Negative	2	on	negative
ICU-0006D8	8	ICU	Away_1	Small	Negative	2	on	negative
ICU-0007D8	8	ICU	Near	Medium	Negative	2	on	negative
ICU-0008D8	8	ICU	Near	Large	Negative	2	on	negative
ICU-0009D8	8	ICU	Near	Small	Negative	2	on	negative
Con-0001D8	8	control	NA	Medium	Negative	2	NA	negative
Con-0002D8	8	control	NA	Large	Negative	2	NA	negative
Con-0003D8	8	control	NA	Small	Negative	2	NA	negative
Ward-0001D9	9	Ward	Away	Medium	Negative	2	on	negative
Ward-0002D9	9	Ward	Away	Large	Negative	2	on	negative
Ward-0003D9	9	Ward	Away	Small	Negative	2	on	negative
Ward-0004D9	9	Ward	Near	Medium	Negative	2	on	negative
Ward-0005D9	9	Ward	Near	Large	Negative	2	on	negative
Ward-0006D9	9	Ward	Near	Small	Negative	2	on	negative
ICU-0001D9	9	ICU	Away_1.7	Medium	Negative	2	on	negative
ICU-0002D9	9	ICU	Away_1.7	Large	Negative	2	on	negative
ICU-0003D9	9	ICU	Away_1.7	Small	Negative	2	on	negative
ICU-0004D9	9	ICU	Away_1	Medium	Negative	2	on	negative
ICU-0005D9	9	ICU	Away_1	Large	Negative	2	on	negative
ICU-0006D9	9	ICU	Away_1	Small	Negative	2	on	negative
ICU-0007D9	9	ICU	Near	Medium	38.54	2	on	positive
ICU-0008D9	9	ICU	Near	Large	Negative	2	on	negative
ICU-0009D9	9	ICU	Near	Small	Negative	2	on	negative
Con-0001D9	9	control	NA	Small	Negative	2	NA	negative
Con-0002D9	9	control	NA	Medium	Negative	2	NA	negative
Con-0003D9	9	control	NA	Large	Negative	2	NA	negative
Ward-0001D10	10	Ward	Away	Medium	Negative	2	on	negative
Ward-0002D10	10	Ward	Away	Large	Negative	2	on	negative
Ward-0003D10	10	Ward	Away	Small	Negative	2	on	negative
Ward-0004D10	10	Ward	Near	Medium	Negative	2	on	negative
Ward-0005D10	10	Ward	Near	Large	Negative	2	on	negative
Ward-0006D10	10	Ward	Near	Small	Negative	2	on	negative
ICU-0001D10	10	ICU	Near	Large	Negative	2	on	negative
ICU-0002D10	10	ICU	Near	Medium	Negative	2	on	negative
ICU-0003D10	10	ICU	Near	Small	Negative	2	on	negative
ICU-0004D10	10	ICU	Away_1	Large	Negative	2	on	negative
ICU-0005D10	10	ICU	Away_1	Medium	Negative	2	on	negative
ICU-0006D10	10	ICU	Away_1	Small	Negative	2	on	negative
ICU-0007D10	10	ICU	Away_1.7	Large	Negative	2	on	negative
ICU-0008D10	10	ICU	Away_1.7	Medium	Negative	2	on	negative
ICU-0009D10	10	ICU	Away_1.7	Small	Negative	2	on	negative
Con-0001D10	10	control	NA	Medium	Negative	2	NA	negative
Con-0002D10	10	control	NA	Large	Negative	2	NA	negative
Con-0003D10	10	control	NA	Small	Negative	2	NA	negative
Ward-0001D11	11	Ward	Near	Medium	39.753	3	off	positive
Ward-0002D11	11	Ward	Near	Large	37.324	3	off	positive
Ward-0003D11	11	Ward	Near	Small	Negative	3	off	negative
Ward-0004D11	11	Ward	Away	Medium	39.524	3	off	positive
Ward-0005D11	11	Ward	Away	Large	40.26	3	off	positive
Ward-0006D11	11	Ward	Away	Small	Negative	3	off	negative
ICU-0001D11	11	ICU	Near	Medium	Negative	3	off	negative
ICU-0002D11	11	ICU	Near	Large	Negative	3	off	negative
ICU-0003D11	11	ICU	Near	Small	Negative	3	off	negative
ICU-0004D11	11	ICU	Away_1	Medium	Negative	3	off	negative
ICU-0005D11	11	ICU	Away_1	Large	Negative	3	off	negative
ICU-0006D11	11	ICU	Away_1	Small	Negative	3	off	negative
ICU-0007D11	11	ICU	Away_1.7	Medium	Negative	3	off	negative
ICU-0008D11	11	ICU	Away_1.7	Large	Negative	3	off	negative
ICU-0009D11	11	ICU	Away_1.7	Small	Negative	3	off	negative
Con-0001D11	11	control	NA	Large	Negative	3	NA	negative
Con-0002D11	11	control	NA	Medium	Negative	3	NA	negative
Con-0003D11	11	control	NA	Small	Negative	3	NA	negative
Ward-0001D12	12	Ward	Away	Medium	Negative	3	off	negative
Ward-0002D12	12	Ward	Away	Large	Negative	3	off	negative
Ward-0003D12	12	Ward	Away	Small	Negative	3	off	negative
Ward-0004D12	12	Ward	Near	Medium	39.813	3	off	positive
Ward-0005D12	12	Ward	Near	Large	Negative	3	off	negative
Ward-0006D12	12	Ward	Near	Small	Negative	3	off	negative
ICU-0001D12	12	ICU	Near	Large	Negative	3	off	negative
ICU-0002D12	12	ICU	Near	Medium	Negative	3	off	negative
ICU-0003D12	12	ICU	Near	Small	Negative	3	off	negative
ICU-0004D12	12	ICU	Away_1.7	Large	Negative	3	off	negative
ICU-0005D12	12	ICU	Away_1.7	Medium	Negative	3	off	negative
ICU-0006D12	12	ICU	Away_1.7	Small	Negative	3	off	negative
ICU-0007D12	12	ICU	Away_1	Large	Negative	3	off	negative
ICU-0008D12	12	ICU	Away_1	Medium	Negative	3	off	negative
ICU-0009D12	12	ICU	Away_1	Small	Negative	3	off	negative
Con-0001D12	12	control	NA	Medium	Negative	3	NA	negative
Con-0002D12	12	control	NA	Large	Negative	3	NA	negative
Con-0003D12	12	control	NA	Small	Negative	3	NA	negative
Ward-0001D13	13	Ward	Away	Medium	Negative	3	off	negative
Ward-0002D13	13	Ward	Away	Large	Negative	3	off	negative
Ward-0003D13	13	Ward	Away	Small	Negative	3	off	negative
Ward-0004D13	13	Ward	Near	Medium	Negative	3	off	negative
Ward-0005D13	13	Ward	Near	Large	Negative	3	off	negative
Ward-0006D13	13	Ward	Near	Small	Negative	3	off	negative
ICU-0001D13	13	ICU	Near	Large	Negative	3	off	negative
ICU-0002D13	13	ICU	Near	Medium	Negative	3	off	negative
ICU-0003D13	13	ICU	Near	Small	Negative	3	off	negative
ICU-0004D13	13	ICU	Away_1	Large	Negative	3	off	negative
ICU-0005D13	13	ICU	Away_1	Medium	Negative	3	off	negative
ICU-0006D13	13	ICU	Away_1	Small	Negative	3	off	negative
ICU-0008D13	13	ICU	Away_1.7	Medium	Negative	3	off	negative
ICU-0007D13	13	ICU	Away_1.7	Large	Negative	3	off	negative
ICU-0009D13	13	ICU	Away_1.7	Small	Negative	3	off	negative
Con-0001D13	13	control	NA	Large	Negative	3	NA	negative
Con-0002D13	13	control	NA	Medium	Negative	3	NA	negative
Con-0003D13	13	control	NA	Small	Negative	3	NA	negative
Ward-0001D14	14	Ward	Near	Large	Negative	3	off	negative
Ward-0002D14	14	Ward	Near	Medium	Negative	3	off	negative
Ward-0003D14	14	Ward	Near	Small	Negative	3	off	negative
Ward-0004D14	14	Ward	Away	Large	Negative	3	off	negative
Ward-0005D14	14	Ward	Away	Medium	40.014	3	off	positive
Ward-0006D14	14	Ward	Away	Small	Negative	3	off	negative
ICU-0001D14	14	ICU	Near	Large	Negative	3	off	negative
ICU-0002D14	14	ICU	Near	Medium	Negative	3	off	negative
ICU-0003D14	14	ICU	Near	Small	Negative	3	off	negative
ICU-0004D14	14	ICU	Away_1	Large	Negative	3	off	negative
ICU-0005D14	14	ICU	Away_1	Medium	Negative	3	off	negative
ICU-0006D14	14	ICU	Away_1	Small	Negative	3	off	negative
ICU-0007D14	14	ICU	Away_1.7	Large	Negative	3	off	negative
ICU-0008D14	14	ICU	Away_1.7	Medium	Negative	3	off	negative
ICU-0009D14	14	ICU	Away_1.7	Small	Negative	3	off	negative
Con-0001D14	14	control	NA	Small	Negative	3	NA	negative
Con-0002D14	14	control	NA	Large	Negative	3	NA	negative
Con-0003D14	14	control	NA	Medium	Negative	3	NA	negative
Ward-0001D15	15	Ward	NA	NA	Negative	3	off	negative
Ward-0002D15	15	Ward	NA	NA	Negative	3	off	negative
Ward-0003D15	15	Ward	NA	NA	Negative	3	off	negative
Ward-0004D15	15	Ward	NA	NA	39.641	3	off	positive
Ward-0005D15	15	Ward	NA	NA	Negative	3	off	negative
Ward-0006D15	15	Ward	NA	NA	Negative	3	off	negative
ICU-0001D15	15	ICU	Near	Large	Negative	3	off	negative
ICU-0002D15	15	ICU	Near	Medium	Negative	3	off	negative
ICU-0003D15	15	ICU	Near	Small	Negative	3	off	negative
ICU-0004D15	15	ICU	Away_1.7	Large	Negative	3	off	negative
ICU-0006D15	15	ICU	Away_1.7	Small	Negative	3	off	negative
ICU-0007D15	15	ICU	Away_1	Large	Negative	3	off	negative
ICU-0008D15	15	ICU	Away_1	Medium	Negative	3	off	negative
ICU-0009D15	15	ICU	Away_1	Small	Negative	3	off	negative
Con-0001D15	15	control	NA	NA	Negative	3	NA	negative
Con-0003D15	15	control	NA	NA	Negative	3	NA	negative
ICU-0005D15	15	ICU	Away_1.7	Medium	Negative	3	off	negative
Con-0002D15	15	control	NA	NA	Negative	3	NA	negative
